# Supplementary material
Source: publisher figshare collection journal article supplement (https://asha.figshare.com/articles/dataset/_/28598195)
Supplement: Supplementary file 1 [file 1]

**Supplemental Table S1.** tDCS-first (*n* = 6) and sham-first (*n* = 6) group and individual subject performance on the Western Aphasia Battery-Revised (WAB-R).

| tDCS-first Group |      |      |      |      |      |      |            | Sham-first group |      |      |      |      |      |             |
|------------------|------|------|------|------|------|------|------------|------------------|------|------|------|------|------|-------------|
|                  | 415  | 416  | 419  | 408  | 412  | 421  | M (SD)     | 409              | 413  | 418  | 410  | 422  | 424  | M (SD)      |
| Content (10)     | 8.0  | 9.0  | 8.0  | 9.0  | 10.0 | 10.0 | 9.0 (0.9)  | 6.0              | 8.0  | 8.0  | 9.0  | 9.0  | 10.0 | 8.3 (1.4)   |
| Fluency (10)     | 5.0  | 8.0  | 9.0  | 9.0  | 9.0  | 9.0  | 8.2 (1.6)  | 6.0              | 8.0  | 9.0  | 9.0  | 9.0  | 9.0  | 8.3 (1.2)   |
| Comp (10)        | 9.4  | 8.2  | 10.0 | 10.0 | 9.0  | 10.0 | 9.4 (0.7)  | 7.9              | 8.6  | 8.3  | 7.6  | 9.0  | 10.0 | 8.6 (0.9)   |
| Rep (10)         | 5.8  | 6.2  | 7.6  | 8.8  | 8.8  | 8.8  | 7.7 (1.4)  | 7.2              | 6.7  | 6.2  | 8.8  | 7.8  | 9.4  | 7.7 (1.2)   |
| Naming (10)      | 8.5  | 3.9  | 6.4  | 8.6  | 6.7  | 8.3  | 7.1 (1.8)  | 6.7              | 2.1  | 6.3  | 7.7  | 8.3  | 9.8  | 6.8 (2.6)   |
| AQ (100)         | 73.4 | 70.6 | 82.0 | 90.8 | 87.0 | 92.2 | 82.7 (9.0) | 67.6             | 66.7 | 75.5 | 84.1 | 86.1 | 96.4 | 79.4 (11.6) |
| WAB Aphasia Type | BF   | C    | An   | An   | An   | An   |            | An               | C    | C    | An   | An   | An   |             |
| PPA Variant      | LV   | LV   | LV   | LV   | LV   | LV   |            | LV               | LV   | LV   | LV   | NF   | NF   |             |

An = Anomic, C = Conduction, BF = Borderline Fluent; LV = Logopenic Variant PPA, NF = Nonfluent/Agrammatic Variant PPA
