# Supplementary material
Source: publisher figshare collection journal article supplement (https://asha.figshare.com/articles/dataset/_/28598195)
Supplement: Supplementary file 3 [file 1]

**Supplemental Table S3.** Psycholinguistics properties of pre- and post-treatment stimuli probes (with examples) for blending words, blending nonwords, and reading nonwords administered before and after each treatment session.

|                            | <b>Blend Words</b> |           | <b>Blend Nonwords</b> |           | <b>Read Nonwords</b> |           |
|----------------------------|--------------------|-----------|-----------------------|-----------|----------------------|-----------|
| <b>Pre-Tx</b>              | (bat, cap)         |           | (lut, feg)            |           | (tam, rab)           |           |
| <b>1-syllable</b>          | <i>M</i>           | <i>SE</i> | <i>M</i>              | <i>SE</i> | <i>M</i>             | <i>SE</i> |
| <b>Length_Syllable</b>     | 1.00               | 0.00      | 1.00                  | 0.00      | 1.00                 | 0.00      |
| <b>Length_Phoneme</b>      | 3.40               | 0.24      | 3.40                  | 0.24      | 3.40                 | 0.14      |
| <b>Length_# of Letters</b> | 3.40               | 0.24      | 3.40                  | 0.24      | 3.40                 | 0.14      |
| Frequency                  | 9.36               | 0.53      |                       |           |                      |           |
| Familiarity                | 5.54               | 0.35      |                       |           |                      |           |
| Age of Acquisition         | 4.55               | 0.35      |                       |           |                      |           |
| Imageability               | 6.38               | 0.28      |                       |           |                      |           |
| <b>2-syllable</b>          | (cabin, finger )   |           | (maset, gafa)         |           | (nikot, giba)        |           |
| <b>Length_Syllable</b>     | 2.00               | 0.00      | 2.00                  | 0.00      | 2.00                 | 0.00      |
| <b>Length_Phoneme</b>      | 5.00               | 0.45      | 5.00                  | 0.32      | 5.00                 | 0.18      |
| <b>Length_# of Letters</b> | 5.20               | 0.37      | 5.20                  | 0.49      | 5.00                 | 0.18      |
| Frequency                  | 8.98               | 0.63      |                       |           |                      |           |
| Familiarity                | 5.47               | 0.39      |                       |           |                      |           |
| Age of Acquisition         | 4.97               | 0.59      |                       |           |                      |           |
| Imageability               | 6.57               | 0.09      |                       |           |                      |           |
| <b>3-syllable</b>          | (potato, casino)   |           | (denota, tepina)      |           | (donlap, geneobo)    |           |
| <b>Length_Syllable</b>     | 3.00               | 0.00      | 3.00                  | 0.60      | 3.00                 | 0.00      |
| <b>Length_Phoneme</b>      | 6.00               | 0.00      | 6.00                  | 1.20      | 7.40                 | 0.29      |
| <b>Length_# of Letters</b> | 6.00               | 0.00      | 6.00                  | 1.20      | 7.80                 | 0.28      |
| Frequency                  | 7.57               | 0.30      |                       |           |                      |           |
| Familiarity                | 6.50               | 0.06      |                       |           |                      |           |
| Age of Acquisition         | 5.14               | 0.68      |                       |           |                      |           |
| Imageability               | 6.68               | 0.04      |                       |           |                      |           |
| <b>Post-Tx</b>             | (mug, car)         |           | (vog, pim)            |           | (lug, dris)          |           |
| <b>1-syllable</b>          | <i>M</i>           | <i>SE</i> | <i>M</i>              | <i>SE</i> | <i>M</i>             | <i>SE</i> |
| <b>Length_Syllable</b>     | 1.00               | 0.00      | 1.00                  | 0.00      | 1.00                 | 0.00      |
| <b>Length_Phoneme</b>      | 3.40               | 0.24      | 2.80                  | 0.24      | 3.40                 | 0.24      |
| <b>Length_# of Letters</b> | 3.80               | 0.37      | 3.80                  | 0.24      | 3.60                 | 0.24      |
| Frequency                  | 10.09              | 0.40      |                       |           |                      |           |
| Familiarity                | 6.30               | 0.22      |                       |           |                      |           |
| Age of Acquisition         | 4.49               | 0.57      |                       |           |                      |           |
| Imageability               | 6.54               | 0.17      |                       |           |                      |           |
| <b>2-syllable</b>          | (panda, comet)     |           | (tunta, giskel)       |           | (pasak, fobro)       |           |
| <b>Length_Syllable</b>     | 2.00               | 0.00      | 2.00                  | 0.00      | 2.00                 | 0.00      |
| <b>Length_Phoneme</b>      | 5.00               | 0.32      | 4.40                  | 0.24      | 5.00                 | 0.32      |
| <b>Length_# of Letters</b> | 5.40               | 0.51      | 5.20                  | 0.20      | 5.20                 | 0.20      |
| Frequency                  | 7.29               | 0.53      |                       |           |                      |           |
| Familiarity                | 5.49               | 0.50      |                       |           |                      |           |

|                                   |                  |          |                  |          |                   |          |
|-----------------------------------|------------------|----------|------------------|----------|-------------------|----------|
| Age of Acquisition                | 5.79             | 0.70     |                  |          |                   |          |
| Imageability                      | 6.50             | 0.24     |                  |          |                   |          |
| <b>3-syllable</b>                 | (corona, domino) |          | (lepido, rinopa) |          | (piboro, lomaren) |          |
| <b>Length_Syllable</b>            | 3.00             | 0.00     | 3.00             | 0.00     | 3.00              | 0.00     |
| <b>Length_Phoneme</b>             | 6.00             | 0.00     | 5.40             | 0.24     | 7.40              | 0.51     |
| <b>Length_# of Letters</b>        | 6.60             | 0.24     | 6.00             | 0.00     | 7.60              | 0.51     |
| Frequency                         | 7.36             | 0.62     |                  |          |                   |          |
| Familiarity                       | 4.76             | 0.23     |                  |          |                   |          |
| Age of Acquisition                | 6.04             | 0.71     |                  |          |                   |          |
| Imageability                      | 6.53             | 0.05     |                  |          |                   |          |
| <b>T-tests Pre-Tx vs. Post-Tx</b> | <i>t</i>         | <i>p</i> | <i>t</i>         | <i>p</i> | <i>t</i>          | <i>p</i> |
| <b>Length_Syllable</b>            | 0.00             | 1.00     | -0.38            | 0.71     | 0.00              | 1.00     |
| <b>Length_Phoneme</b>             | 0.00             | 1.00     | 0.60             | 0.56     | 0.00              | 1.00     |
| <b>Length_# of Letters</b>        | -0.60            | 0.55     | -0.34            | 0.73     | 0.00              | 1.00     |
| Frequency                         | 0.99             | 0.33     |                  |          |                   |          |
| Familiarity                       | -0.02            | 0.98     |                  |          |                   |          |
| Age of Acquisition                | -1.02            | 0.32     |                  |          |                   |          |
| Imageability                      | 0.17             | 0.87     |                  |          |                   |          |

Length\_Syllable: syllable length, Length\_Phoneme: number of phonemes, Length\_# of Letters: number of letters; Frequency: Freq\_HA, LOG10 version of frequency norms based on the Hyperspace Analogue to Language (HAL) corpus; Familiarity: FAM\_Glasgow, a word's subjective familiarity on a scale 1(unfamiliar) to 7(familiar); Age of Acquisition: AoA\_Kuperman12: The age at which people acquire the word, participants were asked to enter age in years at which they thought that they learned the word.

Imageability: Glasgow scale: degree of effort involved in generating a mental image of the concept on a scale 1(unimageable) to 7(imageable). Psycholinguistic measures extracted from SCOPE South Carolina Psycholinguistic Metabase:

[https://www.sc.edu/study/colleges\\_schools/artsandsciences/psychology/research\\_clinical\\_facilities/scope/search.php](https://www.sc.edu/study/colleges_schools/artsandsciences/psychology/research_clinical_facilities/scope/search.php)
