# Supplementary material
Source: publisher figshare collection journal article supplement (https://asha.figshare.com/articles/dataset/_/28598195)

**Supplemental Figure S2.** Modeling of electrical fields induced by tDCS using SimNIBS4 in two representative participants: (A) Position of anode (yellow over F5) and reference electrode (blue over Fp2); (B) Current flow from anode to cathode depicted with directional fields normal to the cortical surface. The positive values (red lines) indicate inward field entering the cortical surface, and negative values (blue lines) indicate outward electrical field leaving the surface. For the anode over F5, the magnitude of the induced electrical field was the strongest in the left frontal and prefrontal regions; (C) Position of anode (yellow over CP5) and reference electrode (blue over Fp2); (D) For the anode over CP5, the magnitude of the induced electrical field was the strongest in the left posterior parietal and temporal regions.

Anode (yellow) over F5 and cathode (blue) over Fp2

A.

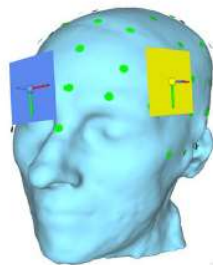

B.

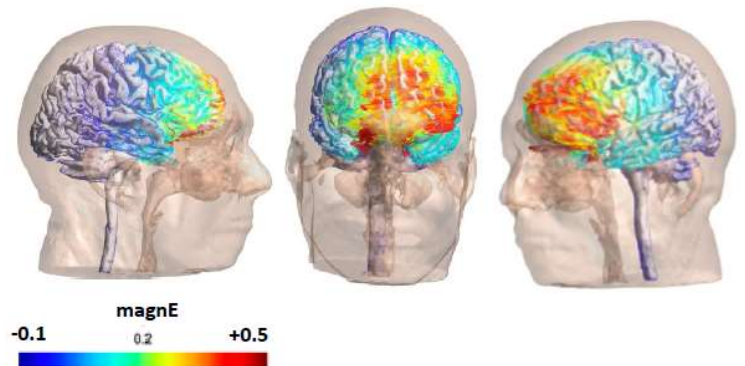

Anode (yellow) over CP5 and cathode (blue) over Fp2

C.

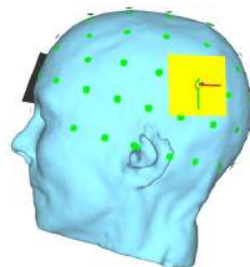

D.

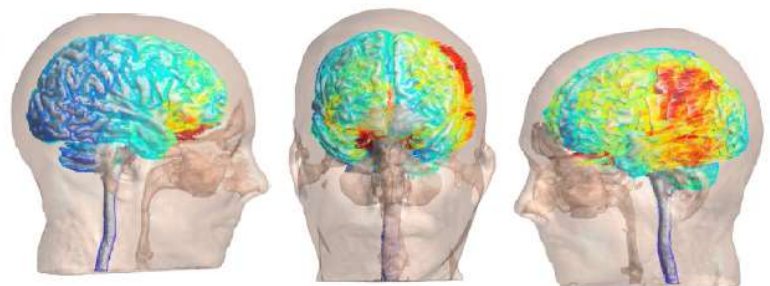

Supplement: Supplementary file 4 [file 1]
