# Supplementary material
Source: publisher figshare collection journal article supplement (https://asha.figshare.com/articles/dataset/_/28598195)
Supplement: Supplementary file 5 [file 1]

**Supplemental Figure S3.** Transcripts of written picture descriptions (WAB Picnic Scene) not included in the main text for participants from the tDCS-first and sham-first groups before and after Phase 1 treatment, Phase 2 treatment, and at follow-up.

| <i>tDCS-First</i>                                                                                                                                                                                                                                                                                                                                                                                                               |                                                                                                                                                                                                                                                                                                                                                                                                                                                                                                   |                                                                                                                                                                                                                                                                                                                                                                                                                                                                                                                                                           |                                                                                                                                                                                                                                                                                                                                                                                                                                                                                                                   |                                                                                                                                                                                                                                                                                                                                                                                                                        |
|---------------------------------------------------------------------------------------------------------------------------------------------------------------------------------------------------------------------------------------------------------------------------------------------------------------------------------------------------------------------------------------------------------------------------------|---------------------------------------------------------------------------------------------------------------------------------------------------------------------------------------------------------------------------------------------------------------------------------------------------------------------------------------------------------------------------------------------------------------------------------------------------------------------------------------------------|-----------------------------------------------------------------------------------------------------------------------------------------------------------------------------------------------------------------------------------------------------------------------------------------------------------------------------------------------------------------------------------------------------------------------------------------------------------------------------------------------------------------------------------------------------------|-------------------------------------------------------------------------------------------------------------------------------------------------------------------------------------------------------------------------------------------------------------------------------------------------------------------------------------------------------------------------------------------------------------------------------------------------------------------------------------------------------------------|------------------------------------------------------------------------------------------------------------------------------------------------------------------------------------------------------------------------------------------------------------------------------------------------------------------------------------------------------------------------------------------------------------------------|
| <b>NF415</b> Pre1 (before tDCS)                                                                                                                                                                                                                                                                                                                                                                                                 | Post1 (after tDCS)                                                                                                                                                                                                                                                                                                                                                                                                                                                                                | Pre2 (before sham)                                                                                                                                                                                                                                                                                                                                                                                                                                                                                                                                        | Post2 (after sham)                                                                                                                                                                                                                                                                                                                                                                                                                                                                                                | Follow-Up                                                                                                                                                                                                                                                                                                                                                                                                              |
| <p>The young girl with sandcastle and shovel and bucket.</p> <p>The boy kite flying with the dog chases the boy</p> <p>The woman pouring the wine and the man reading book</p> <p>The car parking on driveway at the house</p> <p>The tree out <b>forat</b> the house The sailboat has sail and the <b>nuember</b> 407</p> <p>The old man (I am old guy) catches the fish!</p> <p>I am not catch for fish!!</p> <p>(Funny?)</p> | <p>House and by tree and shrub.</p> <p>The car is parking to front on front to house</p> <p>The sailboat has number 470 on sail and two <b>peple</b> people</p> <p>The <b>fisheman</b> is on pier and catching the fish</p> <p>The <b>younyr</b> girl is <b>sandcatsle</b> and have bucket and <b>shose</b>.</p> <p>The boy is flying the kite and dog is chasing the boy</p> <p>The couple has picnic and husband reading book</p> <p>The wife is pouring wine and cup</p> <p>The have music</p> | <p>The tree is <b>leafs</b> and the couple is eating the drinking wine.</p> <p>The music (radio) is soft.</p> <p>The house and carport and car parking in driveway</p> <p>The house two windows and <b>shinrtd</b>.</p> <p>The flag in blowing in wind.</p> <p>The behind house the <b>forrest</b> and right on house is lake.</p> <p>The lake has a pier and fisherman</p> <p>The lake has sailboat and 2 people and one person was wave.</p> <p>The boy was flying the kite and dog was looking for <b>pinic</b></p> <p>The boy is looking at lake.</p> | <p>The couple is picnic.</p> <p>The woman is pouring wine to glass.</p> <p>The man is reading book.</p> <p>The man has <b>sandle</b> off the feet and bare feet.</p> <p>The couple has radio and listen music.</p> <p>The boy has fly and dog catching to boy.</p> <p>The sister on beach and building sandcastle. She has bucket and shove.</p> <p>The pier has fishman and catch fish.</p> <p>Wonderful!</p> <p>I not catching fish for one year!!</p> <p>The bay has sailboat and sailboat has two people.</p> | <p>The couple has <b>pinpic</b>.</p> <p>The woman has wine and bottle is glass.</p> <p>The man is reading book</p> <p>They is music and radio</p> <p>The boy is has fly kite and dog</p> <p>The house and shrubs.</p> <p>The car is outside.</p> <p>The tree by couple and house.</p> <p>Lake pier and girl fishing and the boy is fun is lake.</p> <p>The house past has <b>forrest</b></p> <p>The flag is breeze</p> |

|                                                                                                              |                                                                                                                                                                                                                                                                         |                                                                                                                                                                                                                                                                                     |                                                                                                                                                                                                                                     |                                                                                                                                                                                                                                                                                          |
|--------------------------------------------------------------------------------------------------------------|-------------------------------------------------------------------------------------------------------------------------------------------------------------------------------------------------------------------------------------------------------------------------|-------------------------------------------------------------------------------------------------------------------------------------------------------------------------------------------------------------------------------------------------------------------------------------|-------------------------------------------------------------------------------------------------------------------------------------------------------------------------------------------------------------------------------------|------------------------------------------------------------------------------------------------------------------------------------------------------------------------------------------------------------------------------------------------------------------------------------------|
|                                                                                                              |                                                                                                                                                                                                                                                                         |                                                                                                                                                                                                                                                                                     | <p>The one waves to couple.</p> <p>The sail has number (407)</p> <p>Background picture has house.</p> <p>The house has tree in lawn and shrubs.</p> <p>The pathway has car outside garage.</p> <p>The right side house has flag</p> |                                                                                                                                                                                                                                                                                          |
| # CIUs 52.0<br>Informativeness 91.2<br>% Grammatical Sent 16.7<br>CIU Spelling 96.2<br>Writing Accuracy 86.0 | # CIUs 57.0<br>Informativeness 77.0<br>% Grammatical Sent 11.1<br>CIU Spelling 94.7<br>Writing Accuracy 72.0                                                                                                                                                            | # CIUs 72.0<br>Informativeness 84.7<br>% Grammatical Sent 0.0<br>CIU Spelling 97.2<br>Writing Accuracy 79.1                                                                                                                                                                         | # CIUs 81.0<br>Informativeness 77.9<br>% Grammatical Sent 6.3<br>CIU Spelling 96.3<br>Writing Accuracy 71.2                                                                                                                         | # CIUs 52.0<br>Informativeness 80.0<br>% Grammatical Sent 10.0<br>CIU Spelling 96.2<br>Writing Accuracy 75.4                                                                                                                                                                             |
| <b>LV408</b> Pre1 (before tDCS)                                                                              | Post1 (after tDCS)                                                                                                                                                                                                                                                      | Pre2 (before sham)                                                                                                                                                                                                                                                                  | Post2 (after sham)                                                                                                                                                                                                                  | Follow-Up                                                                                                                                                                                                                                                                                |
| NT                                                                                                           | <p>The family is having a wonderful time.</p> <p>The wife is pouring beverage in the glass and the husband is reading a book.</p> <p>The son is flying a kite with his dog following him.</p> <p>His sister is building a sandcastle with a <b>shover</b> and pail.</p> | <p>The family is enjoying the day.</p> <p>The wife is <b>pour</b> coffee from the thermos and the husband is engrossed in a book.</p> <p>The son is flying a kite with the dog by his side.</p> <p>The sister is at the edge of the lake.<br/>There is a sail boat in the lake.</p> | <p>The parents are on the sand.</p> <p>The father is reading a book + his wife is pouring a cup of coffee.</p> <p>The son is flying a kite with his dog standing beside him.</p> <p>His sister is playing in the sand.</p>          | <p>Mom &amp; Dad are across the street from their house.</p> <p>The wife is pouring him a <b>beveraage</b>.</p> <p>They haven't opened up the <b>picknick</b> container yet.</p> <p>Their son is flying a kite with his dog.</p> <p>His sister is near the lake and building a fort.</p> |

|                                                                                                                                                                                                                                                                                                   |                                                                                                                                                                                        |                                                                                                                                     |                                                                                                                                                                                                                        |                                                                                                                                                                                                                              |
|---------------------------------------------------------------------------------------------------------------------------------------------------------------------------------------------------------------------------------------------------------------------------------------------------|----------------------------------------------------------------------------------------------------------------------------------------------------------------------------------------|-------------------------------------------------------------------------------------------------------------------------------------|------------------------------------------------------------------------------------------------------------------------------------------------------------------------------------------------------------------------|------------------------------------------------------------------------------------------------------------------------------------------------------------------------------------------------------------------------------|
|                                                                                                                                                                                                                                                                                                   | <p>In the disTance, a family is sailing.<br/>There is a fisherman who has just hauled in a fish for dinner.</p> <p>I don't know who lives on the lake though!</p>                      | <p>The family's house is just behind the mother and father.</p> <p>there is someone fishing in the deck</p>                         | <p>There is a man fishing off the pier while a sail boat is in the lake.</p> <p>There is a flag pole with a flag flying.</p> <p>The family's house is in back of the grown-up with the family car in the drive way</p> | <p>There are Two people in the sailboat.</p> <p>And there is someone on the pier.</p> <p>He is pulling in fish.</p> <p>The family lives very close to the.</p> <p>There is a flag in the yard and a car in the driveway.</p> |
|                                                                                                                                                                                                                                                                                                   | <p># CIUs 63.0</p> <p>Informativeness 85.1</p> <p>% Grammatical Sent 87.5</p> <p>CIU Spelling 98.4</p> <p>Writing Accuracy 83.8</p>                                                    | <p># CIUs 64.0</p> <p>Informativeness 95.5</p> <p>% Grammatical Sent 75.0</p> <p>CIU Spelling 98.4</p> <p>Writing Accuracy 94.0</p> | <p># CIUs 72.0</p> <p>Informativeness 91.1</p> <p>% Grammatical Sent 87.5</p> <p>CIU Spelling 100.0</p> <p>Writing Accuracy 91.1</p>                                                                                   | <p># CIUs 80.0</p> <p>Informativeness 95.2</p> <p>% Grammatical Sent 80.0</p> <p>CIU Spelling 97.5</p> <p>Writing Accuracy 92.9</p>                                                                                          |
| <b>LV416</b> Pre1 (before tDCS)                                                                                                                                                                                                                                                                   | Post1 (after tDCS)                                                                                                                                                                     | Pre2 (before sham)                                                                                                                  | Post2 (after sham)                                                                                                                                                                                                     | Follow-Up                                                                                                                                                                                                                    |
| <p>Theres a big tree Car [in picture of garage]</p> <p>Sent man and a women in there</p> <p>son are haveven a micen</p> <p>The man is readin a book and women is drinking something &amp; the son is FLY flying a key.</p> <p>Theres a dog, and, there there [picture of a boat] in the water</p> | <p>theres a tree</p> <p>there a house</p> <p>there peopo eaten</p> <p>Pole</p> <p>there a boy wi</p> <p>theres dog</p> <p>[picture of boat] with people</p> <p>(drawing) 1 - a man</p> | W/D                                                                                                                                 | W/D                                                                                                                                                                                                                    | W/D                                                                                                                                                                                                                          |
| <p># CIUs 38.0</p> <p>Informativeness 84.4</p> <p>% Grammatical Sent 37.5</p>                                                                                                                                                                                                                     | <p># CIUs 21.0</p> <p>Informativeness 95.5</p> <p>% Grammatical Sent 12.5</p>                                                                                                          |                                                                                                                                     |                                                                                                                                                                                                                        |                                                                                                                                                                                                                              |

| CIU Spelling 84.2<br>Writing Accuracy 69.6                                                                                                                                                                                                                                                                                                                                     | CIU Spelling 85.7<br>Writing Accuracy 78.3                                                                                                                                                                                                                                                                                                                                                                                                                                                                                                                                                                                                                                       |                                                                                                                                                                                                                                                                                                                                                                                                                                                                                                                                                                                                                                                                                                                   |                                                                                                                                                                                                                                                                                                                                                                                                                                                                                                                                                                                                                                                                                              |                                                                                                                                                                                                                                                                                                                                                                                                                                                                                                                                                                                                                                                                                                                                     |
|--------------------------------------------------------------------------------------------------------------------------------------------------------------------------------------------------------------------------------------------------------------------------------------------------------------------------------------------------------------------------------|----------------------------------------------------------------------------------------------------------------------------------------------------------------------------------------------------------------------------------------------------------------------------------------------------------------------------------------------------------------------------------------------------------------------------------------------------------------------------------------------------------------------------------------------------------------------------------------------------------------------------------------------------------------------------------|-------------------------------------------------------------------------------------------------------------------------------------------------------------------------------------------------------------------------------------------------------------------------------------------------------------------------------------------------------------------------------------------------------------------------------------------------------------------------------------------------------------------------------------------------------------------------------------------------------------------------------------------------------------------------------------------------------------------|----------------------------------------------------------------------------------------------------------------------------------------------------------------------------------------------------------------------------------------------------------------------------------------------------------------------------------------------------------------------------------------------------------------------------------------------------------------------------------------------------------------------------------------------------------------------------------------------------------------------------------------------------------------------------------------------|-------------------------------------------------------------------------------------------------------------------------------------------------------------------------------------------------------------------------------------------------------------------------------------------------------------------------------------------------------------------------------------------------------------------------------------------------------------------------------------------------------------------------------------------------------------------------------------------------------------------------------------------------------------------------------------------------------------------------------------|
| <b>LV419</b> Pre1 (before tDCS)                                                                                                                                                                                                                                                                                                                                                | Post1 (after tDCS)                                                                                                                                                                                                                                                                                                                                                                                                                                                                                                                                                                                                                                                               | Pre2 (before sham)                                                                                                                                                                                                                                                                                                                                                                                                                                                                                                                                                                                                                                                                                                | Post2 (after sham)                                                                                                                                                                                                                                                                                                                                                                                                                                                                                                                                                                                                                                                                           | Follow-Up                                                                                                                                                                                                                                                                                                                                                                                                                                                                                                                                                                                                                                                                                                                           |
| <p>I this area there is a home building, car, tree, grass, and water area.</p> <p>Sitting on the grass a man + woman sit together.</p> <p>He is reading a book and she is holding on some items where there is a music + food.</p> <p>Near the water a main is flying a <b>Fax</b>.</p> <p>He is near a <b>doog</b> + in the water 3 people, each in <b>diveren boods</b>.</p> | <p>A man + <b>womane</b> are sitting under a tree on the soft ground.</p> <p>The man is reading + the woman is working with a paper.</p> <p>Behind then is a house with a car parked.</p> <p>Behind the house <b>hare</b> high trees or hills.</p> <p>Just off to the mountains is a water area.</p> <p>Between the people + the water is a <b>yung</b> boy <b>flighig</b> a <b>kit</b> above the water.</p> <p>A dog is standing with him but the dog is looking back to the two people.</p> <p><b>Oan</b> the water is a boot <b>fighying</b> along <b>an</b> another one is just up to the land.</p> <p>One boy is <b>doon</b> near the water and playing with the water.</p> | <p>In this area there is a house with a car out side.</p> <p>Near by is a tall tree with a main + woman on the soft ground <b>beneat</b> the tree.</p> <p>The man is sitting and reading near the box of food.</p> <p>Just next to the food box is a woman that is working or playing with her hands.</p> <p>Near her is a box with music.</p> <p>Beyond those people is a man standing near the water, but just flying a [picture of kite] where a dog stands boy and looking back at the <b>to</b> people.</p> <p>Further near the water is a child sitting and playing the water + locks.</p> <p><b>Beyon</b> there is a boat with one or two people.</p> <p>Beyond the water is larger mountains + trees.</p> | <p>At this location there is a house for people.</p> <p>At the outside is a car parked in front.</p> <p>Across the road is a tall tree where two people sent on a pad.</p> <p>The man is sitting and reading a <b>bock</b>.</p> <p>Next to him is a small box and on the other side is a woman working with things in her hands.</p> <p>Very near is a music box.</p> <p>Further to the right is a young man handling a kite over a water area.</p> <p>Near by to him is a nice dog.</p> <p>Beyond that sand is a broad water way in which there is a small child sitting on the rock or sand, and near by is a person catching for food.</p> <p>Even further out is a person in a boot.</p> | <p>This picture illustrates a day out doors near a water area with trees,</p> <p>The house has a car out side that would back up on a drive way.</p> <p>Beyond that is a broad flat area with a <b>taat</b> tree.</p> <p>A soft <b>matearial</b> is laid out and a man + woman sets on that.</p> <p>The man has a book that he is reading with his glasses one.</p> <p>Next to him is a box that is partly open.</p> <p>Across of the box is the woman also <b>setting</b>.</p> <p>She is pouring liquid in to a small container for drinking.</p> <p>To her left is a sound box.</p> <p>To the east of her is a tall kid that holds up a kite above the water area.</p> <p>He has a dog there looking back to the man + woman.</p> |

|                                                                                                                                                          |                                                                                                                                                                                      |                                                                                                                                                                                  |                                                                                                                                                                              |                                                                                                                                                                                                                                                                                                                                                                                                                                                                                                                              |
|----------------------------------------------------------------------------------------------------------------------------------------------------------|--------------------------------------------------------------------------------------------------------------------------------------------------------------------------------------|----------------------------------------------------------------------------------------------------------------------------------------------------------------------------------|------------------------------------------------------------------------------------------------------------------------------------------------------------------------------|------------------------------------------------------------------------------------------------------------------------------------------------------------------------------------------------------------------------------------------------------------------------------------------------------------------------------------------------------------------------------------------------------------------------------------------------------------------------------------------------------------------------------|
|                                                                                                                                                          |                                                                                                                                                                                      |                                                                                                                                                                                  | Across the way is a large area of trees.                                                                                                                                     | <p>Beyond a small area toward the water area is a small container in the wet sand area.</p> <p>Beyond that at the water is a young boys sits + playing with the water + sand and may be <b>fising</b>.</p> <p>To the left of him is another person that is fishing.</p> <p>Further in the water is two people in a boat.<br/>Between the person with a kite is a post with a flag.</p> <p><b>Furth</b> to the left beyond the water broad area beyond the <b>watl</b> there are high trees <b>surrounding</b> that area.</p> |
| # CIUs 53.0<br>Informativeness 79.1<br>% Grammatical Sent 42.9<br>CIU Spelling 94.3<br>Writing Accuracy 74.6                                             | # CIUs 101.0<br>Informativeness 90.2<br>% Grammatical Sent 75.0<br>CIU Spelling 91.1<br>Writing Accuracy 82.1                                                                        | # CIUs 108.0<br>Informativeness 89.3<br>% Grammatical Sent 40.0<br>CIU Spelling 94.4<br>Writing Accuracy 84.3                                                                    | # CIUs 116.0<br>Informativeness 85.9<br>% Grammatical Sent 53.8<br>CIU Spelling 97.4<br>Writing Accuracy 83.7                                                                | # CIUs 175.0<br>Informativeness 80.3<br>% Grammatical Sent 50.0<br>CIU Spelling 97.7<br>Writing Accuracy 78.1                                                                                                                                                                                                                                                                                                                                                                                                                |
| <b><i>Sham-first Group</i></b>                                                                                                                           |                                                                                                                                                                                      |                                                                                                                                                                                  |                                                                                                                                                                              |                                                                                                                                                                                                                                                                                                                                                                                                                                                                                                                              |
| <b><i>LV418</i></b> Pre1 (before sham)                                                                                                                   | Post1 (after sham)                                                                                                                                                                   | Pre2 (before tDCS)                                                                                                                                                               | Post2 (after tDCS)                                                                                                                                                           | Follow-Up                                                                                                                                                                                                                                                                                                                                                                                                                                                                                                                    |
| <p>Young man and a woman are having a picnic on a blanket.</p> <p>The man is reading and the woman is pouring wine, as she was listing on the radio.</p> | <p>A man and a woman are on a carpet.</p> <p>The man is reading and the woman was pouring wine and listen to the radio.</p> <p>Another man was flying a kite and was near a dog.</p> | <p>A man and a woman are on a towel.</p> <p>The man is reading and the woman is <b>poring</b> a drink.</p> <p>They have a basket for food and they are listing to the radio.</p> | <p>A man and girl are sitting on a _____.</p> <p>The girl is <b>poring</b> a drink and listening on the radio.</p> <p>The boy is reading a book and he had dark glasses.</p> | <p>Man and wife is near a house with a car parked.</p> <p>The man and wife are sitting on a rug.</p> <p>The man is reading with glasses and the wife is getting a drink.</p> <p>They are listing on the radio.</p>                                                                                                                                                                                                                                                                                                           |

|                                                                                                                                                                                                                                                                                                               |                                                                                                                                                                               |                                                                                                                                                                                                                                                                                                                                                                                     |                                                                                                                                                                                                                                                                                                                                                                                                         |                                                                                                                                                                                                                                                                                                  |
|---------------------------------------------------------------------------------------------------------------------------------------------------------------------------------------------------------------------------------------------------------------------------------------------------------------|-------------------------------------------------------------------------------------------------------------------------------------------------------------------------------|-------------------------------------------------------------------------------------------------------------------------------------------------------------------------------------------------------------------------------------------------------------------------------------------------------------------------------------------------------------------------------------|---------------------------------------------------------------------------------------------------------------------------------------------------------------------------------------------------------------------------------------------------------------------------------------------------------------------------------------------------------------------------------------------------------|--------------------------------------------------------------------------------------------------------------------------------------------------------------------------------------------------------------------------------------------------------------------------------------------------|
| <p>Another man was <b>flinging</b> a kite and there is dog by the man.</p> <p>Two people are in a boat in a lake.<br/>A boy is playing on the sand.</p> <p>There is a flag near the house and a large tree by the house.</p> <p>There are many trees along the lake.</p> <p>There is a car by the garage.</p> | <p>The boy was by the water and playing in the sand.</p> <p>There is a house with a car and a flag, and a large tree.</p>                                                     | <p>They are under a large tree for shade.</p> <p>The other man was flying a kite, and his dog was playing.</p> <p>Another other boy was playing along the sand and someone was fishing on a pier.</p> <p>Several people were on the boat out on the lake and they can see forest <b>our</b> the lake.</p> <p>The car was out of the garage by the house, and a flag was flying.</p> | <p>They have a basket for a picnic and they are under a large tree.</p> <p>Another man is flying a kite and his dog is looking at the other people.</p> <p>There is a small boy on the sand and he is playing in the sand.</p> <p>Someone is on a dock fishing, and two other people are on a boat waving.</p> <p>The lake is <b>sourned</b> with trees.</p> <p>There is a car parked at the house.</p> | <p>They have food in a basket.</p> <p>Another man is flying a kite and a dog was watching the other people.</p> <p>Another man is playing in the sand near the water and two people are in a boat.</p> <p><b>The</b> can see trees around the lake and a large tree by the house and a flag.</p> |
| <p># CIUs 82.0</p> <p>Informativeness 95.3</p> <p>% Grammatical Sent 70.0</p> <p>CIU Spelling 97.6</p> <p>Writing Accuracy 93.0</p>                                                                                                                                                                           | <p># CIUs 54.0</p> <p>Informativeness 90.0</p> <p>% Grammatical Sent 83.3</p> <p>CIU Spelling 100.0</p> <p>Writing Accuracy 88.3</p>                                          | <p># CIUs 89.0</p> <p>Informativeness 88.1</p> <p>% Grammatical Sent 85.7</p> <p>CIU Spelling 97.8</p> <p>Writing Accuracy 86.1</p>                                                                                                                                                                                                                                                 | <p># CIUs 91.0</p> <p>Informativeness 89.2</p> <p>% Grammatical Sent 85.7</p> <p>CIU Spelling 98.9</p> <p>Writing Accuracy 87.4</p>                                                                                                                                                                                                                                                                     | <p># CIUs 83.0</p> <p>Informativeness 90.3</p> <p>% Grammatical Sent 72.7</p> <p>CIU Spelling 98.8</p> <p>Writing Accuracy 90.3</p>                                                                                                                                                              |
| <b>LV410</b> Pre1 (before sham)                                                                                                                                                                                                                                                                               | Post1 (after sham)                                                                                                                                                            | Pre2 (before tDCS)                                                                                                                                                                                                                                                                                                                                                                  | Post2 (after tDCS)                                                                                                                                                                                                                                                                                                                                                                                      | Follow-Up                                                                                                                                                                                                                                                                                        |
| <p><b>Famaliy</b> w/ <b>HusB</b> is reading &amp; wife.</p> <p>Out to fishing near H2O</p> <p>Nature is <b>builyg cascle</b> in Sand</p> <p>Boy is <b>playes</b> w/ <b>kikT</b> wife god</p>                                                                                                                  | <p>Family <b>aut</b> for water tRip.</p> <p>Had dog, <b>kike</b>, <b>moter bott</b>, swim,</p> <p><b>Picknick</b> w/ Flag Large Tree</p> <p>Home in <b>yareer</b> in car.</p> | <p>a <b>vomil</b> is in a park for having a fun <b>timy</b>!</p> <p>They were relaxing &amp; eating.</p> <p>List <b>kntoo</b>.</p> <p>Flying Kites, <b>Boants</b>,?</p>                                                                                                                                                                                                             | <p><b>Family</b> for nice <b>wether</b>.</p> <p>Husband &amp; <b>Mon</b> w/ Dog.</p> <p><b>Oltres min plae</b> w/ <b>Kits</b>.</p> <p><b>LaRdge Botos Moter Bothes</b>, &amp; small <b>poils</b> too,</p>                                                                                                                                                                                               | <p><b>huspen</b> &amp; wife</p> <p><b>Bow</b> kite</p> <p><b>Giirls plase</b> in <b>san d</b></p> <p>Dog <b>pollots</b></p> <p>Man <b>get</b> a <b>pisH</b></p>                                                                                                                                  |

|                                                                                                                                                                                                                                                                                                                                                                                                                                                                                    |                                                                                                                                                                                                                                                                                                                                                                                                                                                                               |                                                                                                              |                                                                                                             |                                                                                                              |
|------------------------------------------------------------------------------------------------------------------------------------------------------------------------------------------------------------------------------------------------------------------------------------------------------------------------------------------------------------------------------------------------------------------------------------------------------------------------------------|-------------------------------------------------------------------------------------------------------------------------------------------------------------------------------------------------------------------------------------------------------------------------------------------------------------------------------------------------------------------------------------------------------------------------------------------------------------------------------|--------------------------------------------------------------------------------------------------------------|-------------------------------------------------------------------------------------------------------------|--------------------------------------------------------------------------------------------------------------|
| Boat in <b>waters</b>                                                                                                                                                                                                                                                                                                                                                                                                                                                              |                                                                                                                                                                                                                                                                                                                                                                                                                                                                               | They had Pets & <b>maye</b> a small child.                                                                   |                                                                                                             | <b>Chiple</b> in <b>Boad</b>                                                                                 |
| # CIUs 26.0<br>Informativeness 92.9<br>% Grammatical Sent 0.0<br>CIU Spelling 65.4<br>Writing Accuracy 60.7                                                                                                                                                                                                                                                                                                                                                                        | # CIUs 16.0<br>Informativeness 80.0<br>% Grammatical Sent 0.0<br>CIU Spelling 81.3<br>Writing Accuracy 61.9                                                                                                                                                                                                                                                                                                                                                                   | # CIUs 23.0<br>Informativeness 82.1<br>% Grammatical Sent 20.0<br>CIU Spelling 87.0<br>Writing Accuracy 69.0 | # CIUs 13.0<br>Informativeness 72.2<br>% Grammatical Sent 0.0<br>CIU Spelling 61.5<br>Writing Accuracy 38.1 | # CIUs 17.0<br>Informativeness 100.0<br>% Grammatical Sent 0.0<br>CIU Spelling 52.9<br>Writing Accuracy 50.0 |
| <b>NF424</b> Pre1 (before sham)                                                                                                                                                                                                                                                                                                                                                                                                                                                    | Post1 (after sham)                                                                                                                                                                                                                                                                                                                                                                                                                                                            | Pre1 (before tDCS)                                                                                           | Post2 (after tDCS)                                                                                          | Follow-Up                                                                                                    |
| <p>It is a sunny day by the lake <b>wherby</b> two people are riding in a sailboat.</p> <p>On the shore a young boy is using a <b>pale</b> to scoop up water and man is fishing on the <b>pior</b>.</p> <p>One the shoreline a teenage boy is flying a <b>kit</b> with his dog beside him.</p> <p>They are standing by a flag which is waving in the wind.</p> <p>Further back from the shore, a man and woman are having a picnic.</p> <p>They are both sitting on a blanket.</p> | <p>It was a nice day at the lake with two people in a sailboat on the water and a small child playing on the bank with a pale and shovel.</p> <p><b>A</b> older child is on the bank behind the boy flying a kite high above a flag pole as the wind blow them both in the air.</p> <p>A small dog by the older boy was standing looking at a couple on the sand having a picnic.</p> <p>The man was reading a book while the women was <b>pour</b> her a glass of water.</p> | W/D                                                                                                          | W/D                                                                                                         | W/D                                                                                                          |

|                                                                                                                                                                                                                                                                                                                                                      |                                                                                                                                                                                                     |                    |                    |                 |
|------------------------------------------------------------------------------------------------------------------------------------------------------------------------------------------------------------------------------------------------------------------------------------------------------------------------------------------------------|-----------------------------------------------------------------------------------------------------------------------------------------------------------------------------------------------------|--------------------|--------------------|-----------------|
| <p>The blanket has a radio, <b>picknic</b> basket, and thongs on it.</p> <p>The young woman is <b>poring</b> wine and the young man is reading a book.</p> <p>Behind them is a house the house sits in back of a large tree with a car parked in the drive way.</p> <p>The day is pleasant and all the people are happy and enjoying their time.</p> | <p>Beside them was a picnic basket and a small radio.</p> <p>The blanket they were sitting on was in front of under a large tree that was in front of a car parked in the drive way of a house.</p> |                    |                    |                 |
| <p># CIUs 139.0</p> <p>Informativeness 96.5</p> <p>% Grammatical Sent 76.9</p> <p>CIU Spelling 97.1</p> <p>Writing Accuracy 93.8</p>                                                                                                                                                                                                                 | <p># CIUs 98.0</p> <p>Informativeness 91.6</p> <p>% Grammatical Sent 66.7</p> <p>CIU Spelling 98.0</p> <p>Writing Accuracy 88.8</p>                                                                 |                    |                    |                 |
| <b>LV409</b> Pre1 (before sham)                                                                                                                                                                                                                                                                                                                      | Post1 (after sham)                                                                                                                                                                                  | Pre2 (before tDCS) | Post2 (after tDCS) | Follow-Up       |
| Could not write                                                                                                                                                                                                                                                                                                                                      | Could not write                                                                                                                                                                                     |                    |                    |                 |
| <b>LV413</b> Pre1 (before sham)                                                                                                                                                                                                                                                                                                                      | Post1 (after sham)                                                                                                                                                                                  | Pre2 (before tDCS) | Post2 (after tDCS) | Follow-Up       |
| Could not write                                                                                                                                                                                                                                                                                                                                      | Could not write                                                                                                                                                                                     | Could not write    | Could not write    | Could not write |

Informativeness (Inform) =  $[(\#CIUs/\#intelligible\ words)*100]$ , CIU Spelling = Proportion of CIUs spelled correctly, Writing Accuracy =  $[\#CIUs-(\#spelling\ errors)/(\#words + \#paragraphias + \#illegible\ words)*100]$ ; NT = Not Tested, W/D = Withdrawn
