# Supplementary material
Source: publisher figshare collection journal article supplement (https://asha.figshare.com/articles/dataset/_/28598195)
Supplement: Supplementary file 6 [file 1]

**Supplemental Table S4.** Example word and nonword stimuli used during treatment at the 1-, 2-, and 3-syllable levels.

|                 |                                                                                      |                                                                                                       |                                                                                                                    |
|-----------------|--------------------------------------------------------------------------------------|-------------------------------------------------------------------------------------------------------|--------------------------------------------------------------------------------------------------------------------|
| <b>Words</b>    | <b>1-syllable</b><br>cat, voice, fog, kiss,<br>couch, life, boot,<br>book, ship, bus | <b>2-syllable</b><br>paper, river, pillow, laser,<br>father, locket, remote,<br>person, salad, peanut | <b>3-syllable</b><br>memory, safari, cinema,<br>celery, spatula, syllable,<br>domino, medicine, horizon,<br>family |
| <b>Nonwords</b> | <b>1-syllable</b><br>mib, koss, chod, vop,<br>pud, nid, fiss, bap,<br>foom, soff     | <b>2-syllable</b><br>tifa, ronnu, sogo, mosa,<br>feko, dumol, bubin<br>tashep, malgo, tompu           | <b>3-syllable</b><br>lopina, samato, nomilla<br>limora, gamelo, flumina<br>grepalo, sladiny, plumita<br>granilo    |
