# Supplementary material
Source: publisher figshare collection journal article supplement (https://asha.figshare.com/articles/dataset/_/28598195)

**Supplemental Figure S1.** Results of voxel-based morphometry analysis showing regions of significant gray matter volume loss in (A) the tDCS-first group and sham first-groups compared to controls, (B) the tDCS-first group compared to the sham-first group, and (C) those with lvPPA compared to those with nfvPPA.

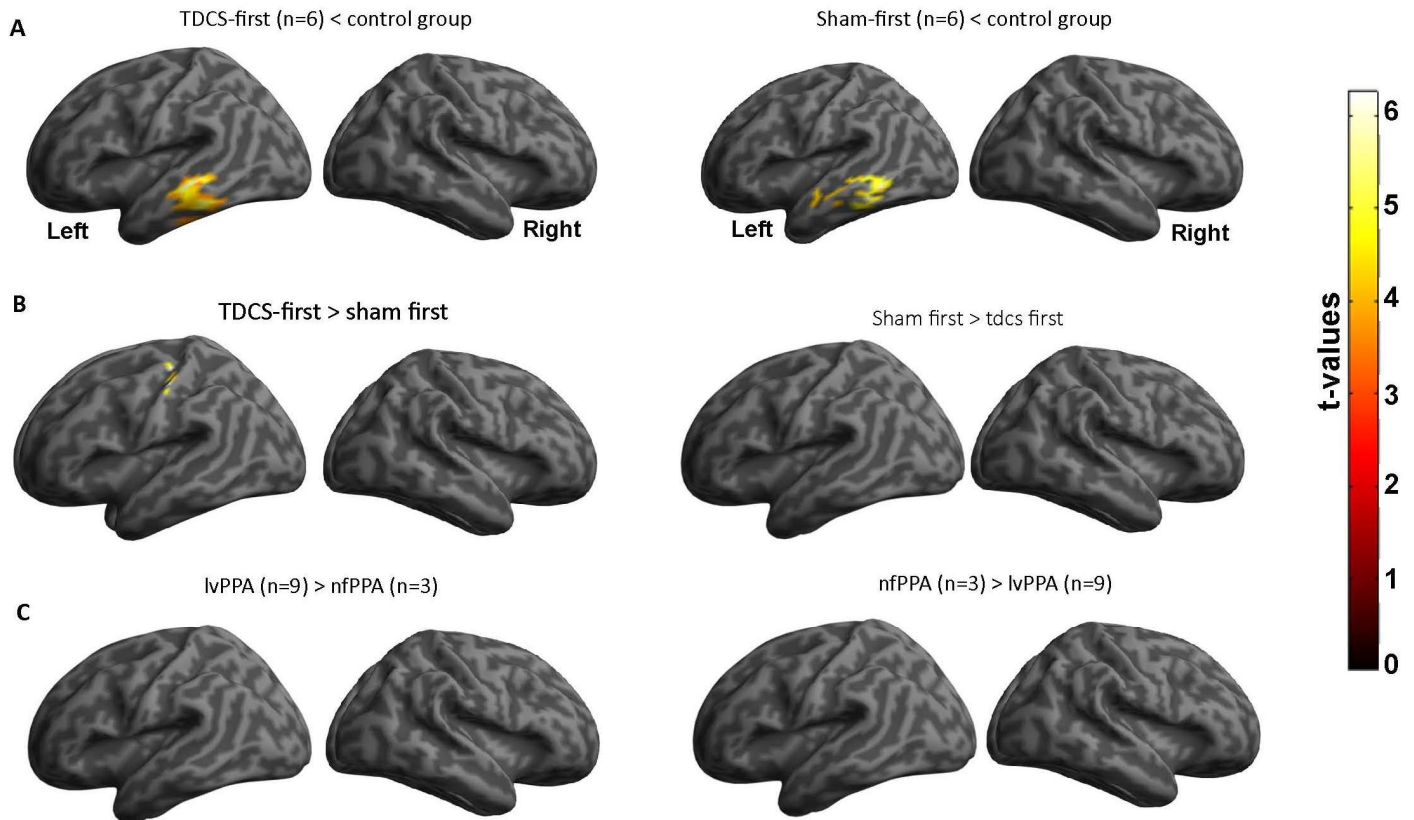

Supplement: Supplementary file 7 [file 1]
