# Supplementary material
Source: publisher figshare collection journal article supplement (https://asha.figshare.com/articles/dataset/_/28598195)
Supplement: Supplementary file 8 [file 1]

**Supplemental Table S2.** Individual subject performance in the tDCS-first and sham-first groups on a comprehensive assessment battery at pre-treatment, with data organized from most to least impairment on a sound blending task (APB). Values reported in percent unless otherwise indicated.

| Task (score type)                               | tDCS-first |           |           |           |           |           | Sham-first |           |           |           |           |           |
|-------------------------------------------------|------------|-----------|-----------|-----------|-----------|-----------|------------|-----------|-----------|-----------|-----------|-----------|
|                                                 | NF<br>415  | LV<br>416 | LV<br>419 | LV<br>408 | LV<br>412 | LV<br>421 | LV<br>409  | LV<br>413 | LV<br>418 | LV<br>410 | NF<br>422 | NF<br>424 |
| <u><b>Naming</b></u>                            |            |           |           |           |           |           |            |           |           |           |           |           |
| Boston Naming Test (Raw)                        | 39         | 9         | 11        | 55        | 23        | 34        | 28         | 4         | 32        | 24        | 59        | 55        |
| <u><b>Phonological Tasks</b></u>                |            |           |           |           |           |           |            |           |           |           |           |           |
| Rhyme Production                                | 70         | 20        | 70        | 90        | 100       | 100       | 60         | 80        | 90        | 90        | 40        | 100       |
| Sound Segmentation (spoken)                     | 48         | 20        | 80        | 95        | 100       | 98        | 33         | 60        | 75        | 68        | 75        | 98        |
| Sound Segmentation (written)                    | 65         | 13        | 70        | 95        | 80        | 95        | <i>nt</i>  | <i>nt</i> | 83        | 75        | 93        | 98        |
| Sound Deletion                                  | 55         | 20        | 75        | 100       | 95        | 90        | 35         | 10        | 25        | 75        | 80        | 100       |
| Sound Blending                                  | 10         | 20        | 40        | 50        | 65        | 90        | 0          | 15        | 20        | 40        | 45        | 95        |
| Sound Replacement                               | 10         | 0         | 33        | 47        | 40        | 67        | 7          | 0         | 0         | 30        | 23        | 73        |
| <u><b>Semantic Processing</b></u>               |            |           |           |           |           |           |            |           |           |           |           |           |
| Camel and Cactus Test                           | 84         | 47        | 75        | 83        | 61        | 80        | 22         | 69        | 81        | 59        | 84        | 84        |
| Peabody Picture Vocabulary Test (Scaled)        | 103        | 82        | 99        | 97        | 99        | 106       | 86         | 85        | 105       | 98        | 128       | 99        |
| Spoken Word-Picture (P47)                       | 98         | 95        | 93        | 100       | 88        | 98        | <i>nt</i>  | 88        | 100       | 100       | 100       | 100       |
| Written Word-Picture (P48)                      | 100        | 75        | 100       | 100       | 85        | 95        | 88         | 80        | 100       | 95        | 98        | 100       |
| Synonym Judgement (P49)                         | 78         | 50        | 77        | 93        | 87        | 100       | 85         | 85        | 93        | 83        | 95        | 95        |
| <u><b>Orthographic Recognition</b></u>          |            |           |           |           |           |           |            |           |           |           |           |           |
| Visual Lexical Decision (P25)                   | 100        | 100       | 82        | 100       | 98        | 100       | 88         | 72        | 98        | 95        | 97        | 100       |
| <u><b>Phonology-Orthography Transcoding</b></u> |            |           |           |           |           |           |            |           |           |           |           |           |
| Letter-to-Sound                                 | 50         | 65        | 90        | 95        | 95        | 95        | 30         | 75        | 100       | 95        | 80        | 85        |
| Sound-to-Letter                                 | 55         | 85        | 85        | 90        | 65        | 100       | <i>nt</i>  | <i>nt</i> | 90        | 80        | 100       | 90        |
| Reading CVC Nonwords                            | 45         | 80        | 70        | 85        | 90        | 100       | 45         | 5         | 95        | 80        | 95        | 90        |
| Spelling CVC Nonwords                           | 5          | 50        | 40        | 80        | 65        | 85        | <i>nt</i>  | <i>nt</i> | 45        | 15        | 80        | 80        |
| <u><b>Syntactic Processing</b></u>              |            |           |           |           |           |           |            |           |           |           |           |           |
| Sentence Production Priming                     | 47         | 20        | 100       | 93        | 87        | 100       | 3          | 17        | 23        | 13        | 80        | 100       |
| Sentence Comprehension                          | 83         | 53        | 100       | 100       | 93        | 100       | 57         | 77        | 80        | 93        | 97        | 100       |
| Argument Structure Production                   | 78         | 47        | 80        | 94        | 84        | 86        | 42         | 91        | 100       | 80        | 84        | 98        |
| Verb Naming                                     | 82         | 50        | 68        | 95        | 91        | 82        | 64         | 50        | 82        | 82        | 86        | 91        |
| <u><b>Auditory Processing</b></u>               |            |           |           |           |           |           |            |           |           |           |           |           |
| Rhyme Judgement (P15)                           | 68         | 45        | 98        | 100       | 100       | 98        | 48         | 100       | 93        | 73        | 75        | 100       |

|                                 |    |    |     |    |    |     |    |    |    |    |     |    |
|---------------------------------|----|----|-----|----|----|-----|----|----|----|----|-----|----|
| Minimal Pair Judgement (P1, P2) | 75 | 90 | 100 | 98 | 98 | 100 | 78 | 98 | 93 | 98 | 100 | 75 |
|---------------------------------|----|----|-----|----|----|-----|----|----|----|----|-----|----|

### Visual-Orthographic Processing

|                                  |     |     |     |     |     |     |    |     |     |     |     |     |
|----------------------------------|-----|-----|-----|-----|-----|-----|----|-----|-----|-----|-----|-----|
| Letter Reversal (P18)            | 100 | 89  | 100 | 100 | 100 | 100 | 86 | 94  | 100 | 100 | 100 | 100 |
| Case Matching (Lower-Upper, P19) | 100 | 100 | 100 | 100 | 100 | 100 | 73 | 100 | 100 | 88  | 100 | 100 |
| Case Matching (Upper-Lower, P20) | 100 | 88  | 100 | 100 | 100 | 100 | 77 | 100 | 100 | 100 | 100 | 100 |

### Speech Production

|                                    |     |     |     |           |           |     |           |     |     |           |     |     |
|------------------------------------|-----|-----|-----|-----------|-----------|-----|-----------|-----|-----|-----------|-----|-----|
| Repeat Words                       | 100 | 100 | 100 | <i>nt</i> | <i>nt</i> | 100 | <i>nt</i> | 100 | 100 | <i>nt</i> | 100 | 100 |
| Repeat Nonwords                    | 65  | 95  | 100 | 100       | 100       | 100 | <i>nt</i> | 85  | 95  | 75        | 100 | 100 |
| Children's Nonword Repetition Test | 28  | 70  | 80  | 95        | 88        | 95  | 68        | 90  | 58  | 70        | 58  | 83  |
| Apraxia of Speech Rating (/3)      | 3   | 0   | 0   | 0         | 0         | 0   | 1         | 0   | 2   | 0         | 0   | 0   |

### Handwriting

|                               |     |    |     |           |           |     |           |    |     |           |     |     |
|-------------------------------|-----|----|-----|-----------|-----------|-----|-----------|----|-----|-----------|-----|-----|
| Lower-to-Uppercase Conversion | 100 | 96 | 88  | <i>nt</i> | <i>nt</i> | 88  | <i>nt</i> | 38 | 100 | <i>nt</i> | 100 | 92  |
| Upper-to-Lowercase Conversion | 92  | 77 | 100 | <i>nt</i> | <i>nt</i> | 100 | <i>nt</i> | 27 | 100 | <i>nt</i> | 100 | 100 |

### Oral Reading

|           |    |     |    |     |     |     |    |    |     |    |     |     |
|-----------|----|-----|----|-----|-----|-----|----|----|-----|----|-----|-----|
| Words     | 73 | 83  | 80 | 98  | 100 | 98  | 88 | 78 | 98  | 95 | 98  | 95  |
| Nonwords  | 45 | 90  | 65 | 90  | 80  | 95  | 45 | 20 | 95  | 65 | 100 | 85  |
| Regular   | 80 | 100 | 85 | 100 | 100 | 100 | 85 | 85 | 100 | 95 | 95  | 100 |
| Irregular | 65 | 65  | 75 | 95  | 100 | 95  | 90 | 70 | 95  | 95 | 100 | 90  |

### Written Spelling

|           |    |    |    |           |           |    |           |           |    |           |     |     |
|-----------|----|----|----|-----------|-----------|----|-----------|-----------|----|-----------|-----|-----|
| Words     | 83 | 35 | 58 | <i>nt</i> | <i>nt</i> | 88 | <i>nt</i> | <i>nt</i> | 75 | <i>nt</i> | 95  | 93  |
| Nonwords  | 5  | 15 | 70 | 65        | 70        | 90 | <i>nt</i> | <i>nt</i> | 70 | 40        | 100 | 90  |
| Regular   | 85 | 55 | 75 | <i>nt</i> | <i>nt</i> | 95 | <i>nt</i> | <i>nt</i> | 75 | <i>nt</i> | 100 | 100 |
| Irregular | 80 | 15 | 40 | <i>nt</i> | <i>nt</i> | 80 | <i>nt</i> | <i>nt</i> | 75 | <i>nt</i> | 90  | 85  |

### Written Narrative (WAB Picnic Scene)

|                                        |    |    |    |           |    |    |           |           |    |    |     |     |
|----------------------------------------|----|----|----|-----------|----|----|-----------|-----------|----|----|-----|-----|
| Correct Information Units (CIUs) (Raw) | 52 | 38 | 53 | <i>nt</i> | 19 | 38 | <i>nt</i> | <i>nt</i> | 82 | 26 | 24  | 139 |
| Informativeness (CIUs/Words)           | 91 | 84 | 79 | <i>nt</i> | 76 | 84 | <i>nt</i> | <i>nt</i> | 95 | 93 | 92  | 97  |
| CIU Spelling                           | 96 | 84 | 94 | <i>nt</i> | 68 | 76 | <i>nt</i> | <i>nt</i> | 97 | 65 | 100 | 97  |
| Writing Accuracy                       | 86 | 70 | 75 | <i>nt</i> | 46 | 58 | <i>nt</i> | <i>nt</i> | 93 | 61 | 92  | 94  |
| Grammatical Sentences                  | 17 | 38 | 43 | <i>nt</i> | 0  | 29 | <i>nt</i> | <i>nt</i> | 70 | 0  | 100 | 77  |

### Overall Cognition

|                                                      |    |   |    |    |    |    |   |   |    |   |    |    |
|------------------------------------------------------|----|---|----|----|----|----|---|---|----|---|----|----|
| Montreal Cognitive Assessment (Raw/30)               | 24 | 7 | 13 | 23 | 15 | 25 | 9 | 6 | 16 | 6 | 19 | 21 |
| Montreal Cognitive Assessment (w/o language, Raw/19) | 16 | 5 | 12 | 16 | 11 | 15 | 8 | 6 | 12 | 5 | 14 | 14 |

### Executive Function

|                                                |    |    |     |           |           |    |           |    |     |           |    |    |
|------------------------------------------------|----|----|-----|-----------|-----------|----|-----------|----|-----|-----------|----|----|
| Trail-Making (Number-Letter Switching, Scaled) | 1  | 1  | 9   | 2         | 2         | 1  | 2         | 1  | 5   | 2         | 1  | 9  |
| Digit Span Forward (Span)                      | 5  | 4  | 6   | 7         | 10        | 8  | 8         | 5  | 5   | 7         | 7  | 11 |
| Digit Span Backward (Span)                     | 2  | 3  | 3   | 4         | 4         | 4  | 3         | 3  | 3   | 3         | 2  | 4  |
| <u>Visuospatial Processing</u>                 |    |    |     |           |           |    |           |    |     |           |    |    |
| Symbol Cancellation                            | 97 | 95 | 100 | 97        | 60        | 97 | 33        | 28 | 100 | 77        | 98 | 93 |
| Complex Figure – Immed Recall (Scaled)         | 17 | 3  | 11  | 11        | 4         | 9  | 0         | 5  | 5   | 5         | 17 | 7  |
| <u>Episodic Memory</u>                         |    |    |     |           |           |    |           |    |     |           |    |    |
| Memory for Faces                               | 90 | 56 | 78  | 66        | 70        | 82 | 54        | 68 | 88  | 78        | 80 | 80 |
| Memory for Words                               | 90 | 36 | 74  | <i>nt</i> | <i>nt</i> | 96 | <i>nt</i> | 68 | 76  | <i>nt</i> | 78 | 86 |
| <u>Nonverbal Problem-Solving</u>               |    |    |     |           |           |    |           |    |     |           |    |    |
| Raven's Coloured Progressive Matrices          | 86 | 47 | 92  | <i>nt</i> | <i>nt</i> | 81 | <i>nt</i> | 61 | 83  | <i>nt</i> | 94 | 72 |

nt = not tested
